# Supplementary material
Source: PubMed Central journal article supplement (PMC4757587)
Supplement: NIHMS440567-supplement-supplemental_materials.pdf [file NIHMS440567-supplement-supplemental_materials.pdf]

# FtsZ Exhibits Rapid Movement and Oscillation Waves in Helix-like Patterns in *Escherichia coli*

Swapna Thanedar and William Margolin

## Supplemental Experimental Procedures

### Strains

All strains were derivatives of *E. coli* K12 and are listed in Table S1. For construction of the  $\Delta mreB::cat$  strain, we performed PCR with *mreB*-homologous primers *mreBKO1* (AGATGATTTTTGCGCCTTGTCGCTGCTGCGCAGGACTAAGGAAG) and *mreBKO2* (CCAGAA TAAGGCGAATCTGTAGCGACGGGCCTTACGCCCGCCCT) to amplify the chloramphenicol acetyltransferase (CAT) gene, and we electroporated the PCR product into WM1826 that had been transiently induced at 42°C. This induces phage  $\lambda$  recombination functions, allowing for high-efficiency chromosomal gene replacement [S1]. Introducing the pET28-FtsA\* plasmid [S2] carrying *ftsA* with the R286W substitution into DY329 (WM1826) promoted cytokinesis in round cells, which are thought to be deficient in the activity of *ftsQAZ*. The resulting  $\Delta mreB::cat$  strain (WM1933) had a complete replacement of the *mreB* gene with *cat*; it was verified by PCR and by the fact that it was possible to cotransduce  $Cm^R$  and spherical morphology to a new strain background. Because of technical difficulties in transducing the chromosomal *ftsZ-gfp* construct into the  $\Delta mreB::cat$  strain WM1933 from EC448, we instead introduced pWM711, a plasmid that synthesizes a low level of FtsZ-GFP constitutively (WM2002). Similar Z rings and mobile helices were observed with pWM711 in *mreB*<sup>+</sup> cells (data not shown), indicating that the FtsZ-GFP expression level was similar to that in EC448. To express GFP-MinD in  $\Delta mreB::cat$  cells, we transformed WM1933 with pWM1255 [S3] to make WM1928. WM1135 is an FtsZ depletion strain (WM746) that contains an *ftsZ* null allele on the chromosome and an *ftsZ*-containing plasmid with a thermosensitive origin of replication and into which the *ftsZ-gfp* from EC448 was introduced by P1 phage transduction.

### Plasmids

All plasmids are shown in Table S1. To make plasmid pWM711, we cloned the *ftsZ-gfp* fusion from pZG [S4] as a *Ecl*136II-*Apal* fragment

into pcDNA 3.1 (Invitrogen) cleaved with *EcoRV* and *Apal*. The *ftsZ-gfp* fusion is expressed constitutively from a vector promoter. To construct plasmid pWM2024, expressing GFP-MreB, we amplified the chromosomal *mreBC* region with primers *mreB9* (TGAGCTCATGGTTGGTAAAGTA) and *mreC* (TTTCTAGATTGCCCTCCCGCGCAC) and cloned the product between the *SacI* and *XbaI* sites of pDSW207 [S5]. To construct plasmid pWM1736 expressing *SulA*, we amplified the chromosomal *sulA* gene with primers *SulA5* (AAGAGCTCACAGGGGCTGGATTG) and *SulA4* (GGTCTAGAATGATACA AATTAGAGTG) and cloned the product between the *SacI* and *XbaI* sites of pBAD33 [S6].

### Growth Conditions and Microscopy

All strains containing FtsZ-GFP were grown in LB medium at the temperatures indicated in the figure legends. Unless otherwise stated, FtsZ-GFP expression was induced with 40  $\mu$ M IPTG for 2–3 hr. Because the basal expression levels of GFP-MinD from pWM1255 and FtsZ-GFP from pWM711 were sufficient for detection, no IPTG was necessary in those experiments. Induction of *SulA* expression with 0.1% arabinose in WM2012 completely inhibited cell division, whereas addition of no arabinose resulted in only slightly elongated cells. When cells were ready for microscopic examination, they were immobilized in LB containing a final concentration of 1.5% low-melting-point agarose under glass coverslips, and GFP fluorescence time courses were performed essentially as described previously [S3]. Great care was taken to keep the specimen in the focal plane throughout the time courses; this was aided by zooming in on a part of the field.

Immunofluorescence microscopy was performed as described previously, by methanol fixation followed by probing with affinity-purified anti-FtsZ, Alexa-488-conjugated goat anti-rabbit secondary antibody and fluorescence microscopy [S7]. Live cells expressing GFP fusions were immobilized and examined by time-lapse fluorescence microscopy as described previously [S3].

Table S1. Strains Used in this Study

| Strain or Plasmid | Genotype                                                                                                                                                                                                                                               | Source/Reference             |
|-------------------|--------------------------------------------------------------------------------------------------------------------------------------------------------------------------------------------------------------------------------------------------------|------------------------------|
| TOP10             | F- <i>mcrA</i> $\Delta$ ( <i>mrr-hsdRMS-mcrBC</i> ) $\phi$ 80 <i>lacZ</i> $\Delta$ M15 $\Delta$ <i>lacX74</i> <i>deoR</i> <i>recA1</i> <i>araD139</i><br>$\Delta$ ( <i>araA-leu</i> )7697 <i>galU</i> <i>galK</i> <i>rpsL</i> <i>endA1</i> <i>nupG</i> | Invitrogen                   |
| DY329             | W3110 $\Delta$ <i>lacU169</i> <i>nadA::Tn10</i> <i>gal490</i> $\lambda$ ci857 $\Delta$ ( <i>cro-bioA</i> )                                                                                                                                             | [S1]                         |
| TX3772            | MG1655 (wild-type) with $\Delta$ <i>lacU169</i>                                                                                                                                                                                                        | Lab collection               |
| EC448             | MC4100 $\Delta$ ( $\lambda$ attL- <i>lom</i> ):: <i>bla</i> <i>lacI</i> <sup>P</sup> <i>P</i> trc <sub>208</sub> - <i>ftsZ-gfp</i>                                                                                                                     | [S5]                         |
| EC488             | EC448 <i>ftsZ84</i> (ts)                                                                                                                                                                                                                               | [S5]                         |
| WM746             | WX7 ( <i>ftsZ</i> null)/ <i>ftsZ</i> on thermosensitive plasmid (pCX41)                                                                                                                                                                                | [S8]                         |
| WM947             | MG1655 $\Delta$ <i>minCDE::aph</i>                                                                                                                                                                                                                     | [S7]                         |
| WM1135            | WM746 with $\Delta$ ( $\lambda$ attL- <i>lom</i> ):: <i>bla</i> <i>lacI</i> <sup>P</sup> <i>P</i> trc <sub>208</sub> - <i>ftsZ-gfp</i>                                                                                                                 | EC448 P1 → WM746             |
| WM1826            | pET28- <i>ftsA</i> * (R286W) in DY329                                                                                                                                                                                                                  | This study                   |
| WM1928            | <i>P</i> trc <sub>207</sub> - <i>gfp-minD</i> , <i>minE</i> in $\Delta mreB::cat$ /pET28- <i>ftsA</i> *(R286W)                                                                                                                                         | pWM1255 → WM1933             |
| WM1933            | DY329 $\Delta mreB::cat$ pET28- <i>ftsA</i> *(R286W)                                                                                                                                                                                                   | $\Delta mreB::cat$ in WM1826 |
| WM1993            | EC448 $\Delta$ <i>minCDE::aph</i>                                                                                                                                                                                                                      | WM947 → EC448                |
| WM1994            | EC448 $\Delta$ <i>minCDE::aph</i>                                                                                                                                                                                                                      | WM947 → EC448                |
| WM2002            | $\Delta mreB::cat$ with constitutive <i>ftsZ-GFP</i>                                                                                                                                                                                                   | pWM711 → WM1933              |
| WM2012            | MC4100 $\Delta$ ( $\lambda$ attL- <i>lom</i> ):: <i>bla</i> <i>lacI</i> <sup>P</sup> <i>P</i> trc <sub>208</sub> - <i>ftsZ-gfp</i> <i>P</i> <sub>ara</sub> - <i>sulA</i>                                                                               | pWM1736 → EC448              |
| WM2024            | <i>P</i> trc <sub>207</sub> - <i>gfp-mreB</i> , <i>mreC</i>                                                                                                                                                                                            | pWM2024 → TOP10              |
| pcDNA3.1          | Mammalian expression vector                                                                                                                                                                                                                            | Invitrogen                   |
| pZG               | <i>P</i> <sub>lac</sub> - <i>ftsZ-gfp</i> (pZG + <i>lacI</i> <sup>R</sup> )                                                                                                                                                                            | [S4]                         |
| pWM711            | Constitutive expression of <i>ftsZ-gfp</i> in pcDNA3.1                                                                                                                                                                                                 | This study                   |
| pWM1255           | <i>P</i> trc <sub>207</sub> - <i>gfp-minD</i> , <i>minE</i>                                                                                                                                                                                            | [S3]                         |
| pWM1736           | <i>P</i> <sub>ara</sub> - <i>sulA</i> in pBAD33                                                                                                                                                                                                        | This study                   |
| pWM2024           | <i>P</i> trc <sub>207</sub> - <i>gfp-mreB</i> , <i>mreC</i>                                                                                                                                                                                            | This study                   |

### Analysis of Fluorescence Dynamics

To determine whether the movement of fluorescence in cells expressing FtsZ-GFP was oscillatory and to quantitate the oscillation period, we opened the time-lapse images of a given cell in ImageJ 1.31 freeware to make a stack. We then used the time-lapse images to make a borderless montage similar to that shown in Figure 1B and rotated the montage such that the time lapse read from left to right. Transects were then made across the two cellular regions to be compared, usually the top half and bottom half (or one end and the middle of a filament, for the cell in Figure 3B), and the grayscale intensity profile was plotted over the entire time course for each transect. Numerical values of the peaks from the resulting plots for each time point were paired, and the differences between values (e.g., left half of the cell minus the right half) were obtained in Microsoft Excel. The results were imported into Kaleidagraph, and these differences were then plotted against time to reveal when the fluorescence was the same in each cell half (value = zero) or when fluorescence in one half was greater than that in the other half, which would give either a positive or negative numerical value depending on which half of the cell had the most fluorescence intensity. The advantages of this subtractive calculation method are that periodic oscillations can be readily visualized in a plot, and the frequent decrease of fluorescence over time due to photobleaching is automatically normalized.

### Supplemental References

- S1. Yu, D., Ellis, H.M., Lee, E.C., Jenkins, N.A., Copeland, N.G., and Court, D.L. (2000). An efficient recombination system for chromosome engineering in *Escherichia coli*. *Proc. Natl. Acad. Sci. USA* **97**, 5978–5983.
- S2. Geissler, B., Elraheb, D., and Margolin, W. (2003). A gain of function mutation in *ftsA* bypasses the requirement for the essential cell division gene *zipA* in *Escherichia coli*. *Proc. Natl. Acad. Sci. USA* **100**, 4197–4202.
- S3. Corbin, B.D., Yu, X.-C., and Margolin, W. (2002). Exploring intracellular space: function of the Min system in round-shaped *Escherichia coli*. *EMBO J.* **21**, 1988–2008.
- S4. Ma, X., Ehrhardt, D.W., and Margolin, W. (1996). Colocalization of cell division proteins FtsZ and FtsA to cytoskeletal structures in living *Escherichia coli* cells by using green fluorescent protein. *Proc. Natl. Acad. Sci. USA* **93**, 12998–13003.
- S5. Weiss, D.S., Chen, J.C., Ghigo, J.M., Boyd, D., and Beckwith, J. (1999). Localization of FtsI (PBP3) to the septal ring requires its membrane anchor, the Z ring, FtsA, FtsQ, and FtsL. *J. Bacteriol.* **181**, 508–520.
- S6. Guzman, L.M., Belin, D., Carson, M.J., and Beckwith, J. (1995). Tight regulation, modulation, and high-level expression by vectors containing the arabinose PBAD promoter. *J. Bacteriol.* **177**, 4121–4130.
- S7. Yu, X.-C., and Margolin, W. (1999). FtsZ ring clusters in *min* and partition mutants: role of both the Min system and the nucleoid in regulating FtsZ ring localization. *Mol. Microbiol.* **32**, 315–326.
- S8. Wang, X.D., de Boer, P.A., and Rothfield, L.I. (1991). A factor that positively regulates cell division by activating transcription of the major cluster of essential cell division genes of *Escherichia coli*. *EMBO J.* **10**, 3363–3372.
